# Supplementary material for: Establishing consensus on nutrition competencies for medicine: a Delphi study
Source: BMJ Nutr Prev Health. 2024 Feb 5;7(1):68–77. doi: 10.1136/bmjnph-2023-000807 (PMC11221290; doi:10.1136/bmjnph-2023-000807)
Supplement: Supplementary data [file bmjnph-2023-000807supp001.pdf]

**Supplementary Table 1. Expert panel: Level of agreement across rounds on nutrition competencies for medicine**

| Statement                                                                                                                                                                                                                   | Level of agreement |           |             | Decision                |
|-----------------------------------------------------------------------------------------------------------------------------------------------------------------------------------------------------------------------------|--------------------|-----------|-------------|-------------------------|
|                                                                                                                                                                                                                             | Round one          | Round two | Round three |                         |
| <b>Enabling Competencies (knows)</b>                                                                                                                                                                                        |                    |           |             |                         |
| Social determinants of health as they pertain to diet-related chronic disease                                                                                                                                               | 89.6%              | -         | -           | Included <sup>1</sup>   |
| Nutritional content of food, including the major dietary sources of macronutrients and micronutrients                                                                                                                       | 54.2%              | 71.8%     | -           | Eliminated <sup>2</sup> |
| Basic scientific principles of human nutrition                                                                                                                                                                              | 81.3%              | -         | -           | Included                |
| Nutrition requirements across the lifespan                                                                                                                                                                                  | 75.0%              | 76.9%     | -           | Eliminated              |
| Breastfeeding and complementary feeding practices                                                                                                                                                                           | 85.4%              | -         | -           | Included                |
| Awareness of food allergies and intolerances, including when it is appropriate to refer for specialist intervention and support of advice provided as part of a multidisciplinary approach                                  | 60.4%              | 71.8%     | 93.8%       | Included                |
| How disease affects nutritional intake                                                                                                                                                                                      | 95.8%              | -         | -           | Included                |
| How nutritional intake affects disease and recovery                                                                                                                                                                         | 93.8%              | -         | -           | Included                |
| Nutrition screening (e.g., MST, MUST)                                                                                                                                                                                       | 75.0%              | 64.1%     | -           | Eliminated              |
| Nutrition Assessment                                                                                                                                                                                                        | 60.4%              | 46.2%     | -           | Excluded <sup>3</sup>   |
| Awareness of behaviour change and counselling strategies to support dietary change                                                                                                                                          | 68.8%              | 69.2%     | -           | Eliminated              |
| The role and scope of practice of other health professionals in nutrition care (e.g., dietitian, practice nurse)                                                                                                            | 97.9%              | -         | -           | Included                |
| The role of other services in nutrition care, including awareness of the range of social and clinical prescribing options to support nutrition (e.g., group education, emergency food provision or meal delivery services). | 97.9%              | -         | -           | Included                |
| Demonstrate understanding of common medications and possible interactions with diet and nutrition                                                                                                                           | Suggested          | 87.2%     | -           | Included                |
| Demonstrate understanding of the bi-directional relationship between food and health systems and environmental sustainability                                                                                               | Suggested          | 43.6%     | -           | Excluded                |
| <b>Critical Competencies (knows how)</b>                                                                                                                                                                                    | Round one          | Round two | Round three | Decision                |
| Describe evidence-based dietary strategies for the promotion of health and prevention of disease                                                                                                                            | 81.3%              | -         | -           | Included                |
| Describe evidence-based dietary strategies for the management of disease                                                                                                                                                    | 79.2%              | 76.9%     | -           | Eliminated              |

|                                                                                                                                                            |           |           |             |            |
|------------------------------------------------------------------------------------------------------------------------------------------------------------|-----------|-----------|-------------|------------|
| Describe when to start nutrition support, including parenteral and enteral nutrition                                                                       | 66.7%     | 53.9%     | -           | Eliminated |
| Calculate energy expenditure of an individual                                                                                                              | 20.8%     | 12.8%     | -           | Excluded   |
| Calculate nutrition requirements for an individual                                                                                                         | 20.8%     | 10.3%     | -           | Excluded   |
| Take a diet/nutrition-related history                                                                                                                      | 45.8%     | 53.9%     | -           | Eliminated |
| Use a validated tool to conduct nutrition screening (e.g., MST, MUST) and assessment (e.g., MNA, SGA)                                                      | 66.7%     | 51.3%     | -           | Eliminated |
| Interpret findings from nutrition screening and assessment                                                                                                 | 70.8%     | 56.4%     | -           | Eliminated |
| Identify and define nutritional problems                                                                                                                   | 66.7%     | 71.8%     | -           | Eliminated |
| Identify when it is appropriate to refer to a specialist (e.g., a dietitian)                                                                               | 100.0%    | -         | -           | Included   |
| Locate reputable nutrition information                                                                                                                     | 91.7%     | -         | -           | Included   |
| Application-based competencies (shows how/does)                                                                                                            | Round one | Round two | Round three | Decision   |
| Conduct nutrition screening as part of routine medical care                                                                                                | 77.1%     | 69.2%     | -           | Eliminated |
| Conduct nutrition assessment as part of routine medical care                                                                                               | 52.1%     | 35.9%     | -           | Excluded   |
| Apply nutrition evidence appropriately in practice                                                                                                         | 85.4%     | -         | -           | Included   |
| Select and prescribe dietary strategies in the prevention and management of disease                                                                        | 62.5%     | Separated | -           | -          |
| Select and apply dietary strategies in the promotion of health and prevention of disease                                                                   | -         | 81.6%     | -           | Included   |
| Select and apply dietary strategies in the treatment of disease                                                                                            | -         | 68.4%     | -           | Eliminated |
| Provide brief, evidence-based nutrition advice to patients                                                                                                 | 85.4%     | -         | -           | Included   |
| Provide evidence-based nutrition education to patients                                                                                                     | 56.3%     | 53.9%     | -           | Eliminated |
| Develop and appropriately document a nutrition care plan with specific goals                                                                               | 25.0%     | 23.1%     | -           | Excluded   |
| Refer at-risk patients or those who might benefit from specialist dietetic care                                                                            | 97.9%     | -         | -           | Included   |
| Provide nutrition counselling using a range of behaviour change techniques (e.g., motivational interviewing) to elicit positive nutrition behaviour change | 54.2%     | 51.3%     | -           | Eliminated |
| Monitor nutrition status                                                                                                                                   | 64.6%     | 59.0%     | -           | Eliminated |
| Modify dietary recommendations or a nutrition care plan as needed                                                                                          | 31.3%     | 35.9%     | -           | Excluded   |
| Work effectively in a multidisciplinary team to deliver nutrition care                                                                                     | 87.5%     | -         | -           | Included   |
| Initiate nutrition support when appropriate                                                                                                                | 58.3%     | 59.0%     | -           | Eliminated |
| Consider and apply principles of ethics related to nutrition care (e.g., end of life feeding decisions)                                                    | 87.5%     | -         | -           | Included   |

|                                                                                                                                            |           |       |        |            |
|--------------------------------------------------------------------------------------------------------------------------------------------|-----------|-------|--------|------------|
| Demonstrate awareness of weight-based stigma                                                                                               | 89.6%     | -     | -      | Included   |
| Demonstrate awareness of own personal health and nutrition biases                                                                          | 87.5%     | -     | -      | Included   |
| Demonstrate empathy and understanding in the context of nutrition care                                                                     | 93.8%     | -     | -      | Included   |
| Demonstrate awareness of the socio-cultural determinants of health and how they might impact dietary intake of individuals and populations | 93.8%     | -     | -      | Included   |
| Demonstrate confidence in ability to elicit nutrition behaviour change in patients                                                         | 58.3%     | 41.0% | -      | Excluded   |
| Identifies opportunities and advocates for change to the wider social, cultural and/or political environment to improve nutrition          | Suggested | 48.7% | -      | Excluded   |
| Identify the impact of mental health on diet and disease and refer to mental health specialists as appropriate                             | Suggested | 76.9% | -      | Eliminated |
| Take a brief diet history as part of a medical examination                                                                                 | -         | -     | 72.3%  | Eliminated |
| Allocate nutrition screening to another member of the multidisciplinary team (e.g., a GP practice nurse)                                   | -         | -     | 68.1%  | Eliminated |
| Consider the findings from nutrition screening and assessment as part of medical care                                                      | -         | -     | 87.2%  | Included   |
| Coordinate care when an individual may benefit from further nutrition assessment or specialist dietary advice                              | -         | -     | 87.2%  | Included   |
| Reinforce nutrition advice or recommendations provided by a specialist (e.g., a dietitian)                                                 | -         | -     | 89.36% | Included   |

<sup>1</sup> Included = Included by consensus (defined as  $\geq 80\%$  level of agreement)

<sup>2</sup> Eliminated = Did not achieve consensus

<sup>3</sup> Excluded = Excluded by consensus (defined as  $\geq 50\%$  level of disagreement or  $\leq 50\%$  level of agreement)

Supplementary Table 2. Importance and relevance of nutrition to medical care

| Statement                                        | Level of agreement (%) |           |             |
|--------------------------------------------------|------------------------|-----------|-------------|
|                                                  | Round one              | Round two | Round three |
| How important is nutrition to your medical care? | 77.8%                  | 89.5%     | -           |
| How relevant is nutrition to your medical care?  | 81.5%                  | -         | -           |

Supplementary Table 3. Relevance of skills and attributes in nutrition care

| Nutrition skills and attributes for medicine                                                                                                                                                                                                     | Level of agreement |
|--------------------------------------------------------------------------------------------------------------------------------------------------------------------------------------------------------------------------------------------------|--------------------|
| Able to communicate effectively in the context of food and nutrition (e.g., nutrition counselling, behaviour change strategies)                                                                                                                  | 92.00%             |
| Able to work in a team effectively to provide high-quality, effective nutrition care to patients                                                                                                                                                 | 84.00%             |
| Demonstrates awareness of weight-based stigma and relationship with food and body                                                                                                                                                                | 96.00%             |
| Is open-minded and willing to investigate nutrition-related concerns with a patient                                                                                                                                                              | 96.00%             |
| Demonstrates confidence in ability to help a patient make changes to their diet                                                                                                                                                                  | 88.00%             |
| Demonstrates empathy and understanding in the context of food and nutrition                                                                                                                                                                      | 100.00%            |
| Demonstrates awareness of the socio-cultural determinants of health (economic and social conditions that can underpin individual and group differences in health status) and how they might impact dietary intake of individuals and populations | 92.00%             |

**Supplementary Table 4. The role of general practitioners and other medical specialists in nutrition care**

| Statement                                                                                                                                        | Level of agreement (%) |           |
|--------------------------------------------------------------------------------------------------------------------------------------------------|------------------------|-----------|
|                                                                                                                                                  | Round one              | Round two |
| How important is it to you that a GP can assess your diet?                                                                                       | 73.1%                  | 79.0%     |
| How important is it to you that a GP can identify nutrition-related issues?                                                                      | 84.6%                  | -         |
| How important is it to you that a GP can provide brief nutrition advice?                                                                         | 69.2%                  | 79.0%     |
| How important is it to you that a GP can provide detailed nutrition advice?                                                                      | 65.4%                  | 57.9%     |
| How important is it to you that a GP can provide individualised nutrition advice?                                                                | 69.2%                  | 57.9%     |
| How important is it to you that a GP can locate and provide you with nutrition education resources (e.g., a pamphlet)?                           | 73.1%                  | 79.0%     |
| How important is it to you that a GP can manage a nutrition-related health condition?                                                            | 73.1%                  | 79.0%     |
| How important is it to you that a GP can identify when to refer to a dietitian/nutritionist for specialist advice?                               | 88.5%                  | -         |
| How important is it to you that a medical specialist can assess your diet?                                                                       | 76.0%                  | 73.7%     |
| How important is it to you that a medical specialist can identify nutrition-related issues?                                                      | 76.0%                  | 84.2%     |
| How important is it to you that a medical specialist can provide brief nutrition advice?                                                         | 60.0%                  | 73.7%     |
| How important is it to you that a medical specialist can provide detailed nutrition advice?                                                      | 64.0%                  | 63.2%     |
| How important is it to you that a medical specialist can provide individualised nutrition advice?                                                | 64.0%                  | 73.7%     |
| How important is it to you that a medical specialist can locate and provide you with reputable nutrition education resources (e.g., a pamphlet)? | 68.0%                  | 84.2%     |
| How important is it to you that a medical specialist can manage a nutrition-related health condition?                                            | 68.0%                  | 63.2%     |
| How important is it to you that a medical specialist can identify when to refer to a dietitian/nutritionist for specialist advice?               | 80.0%                  | -         |
